# Supplementary material for: A comparison of prostate cancer bone metastases on 18F-Sodium Fluoride and Prostate Specific Membrane Antigen (18F-PSMA) PET/CT: Discordant uptake in the same lesion
Source: PubMed Central journal article supplement (PMC6340866; doi:10.18632/oncotarget.26481), 2018-12-28
Supplement: oncotarget-09-37676-s001.pdf [file oncotarget-09-37676-s001.pdf]

## A comparison of prostate cancer bone metastases on $^{18}\text{F}$ -Sodium Fluoride and Prostate Specific Membrane Antigen ( $^{18}\text{F}$ -PSMA) PET/CT: Discordant uptake in the same lesion

### SUPPLEMENTARY MATERIALS

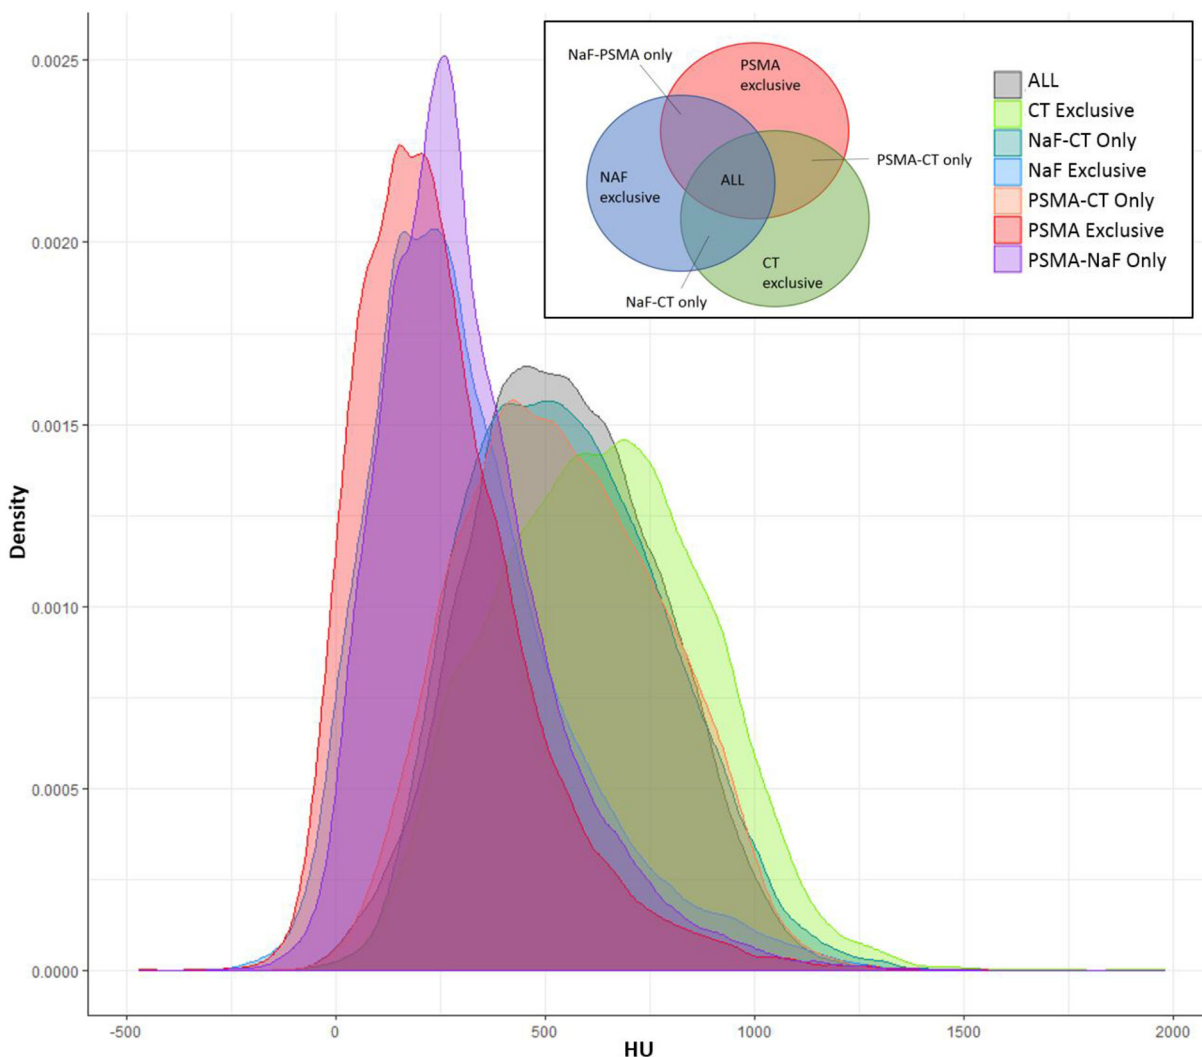

**Supplementary Figure 1: Density plot (histogram) of voxel-based CT values (HU) by imaging concordance for both  $^{18}\text{F}$ -DCFBC cohort (N=54028 voxels) and  $^{18}\text{F}$ -DCFPyL cohort (N=119978 voxels). Voxels contained exclusively within PSMA ROI (red) demonstrate lower HU (less sclerotic) compared to voxels contained within all ROIs (grey) or voxels exclusively contained within CT ROI (green). Similar to PSMA-exclusive regions, voxels contained exclusively in NaF ROIs were less sclerotic than regions overlapping with CT ROIs (blue).**

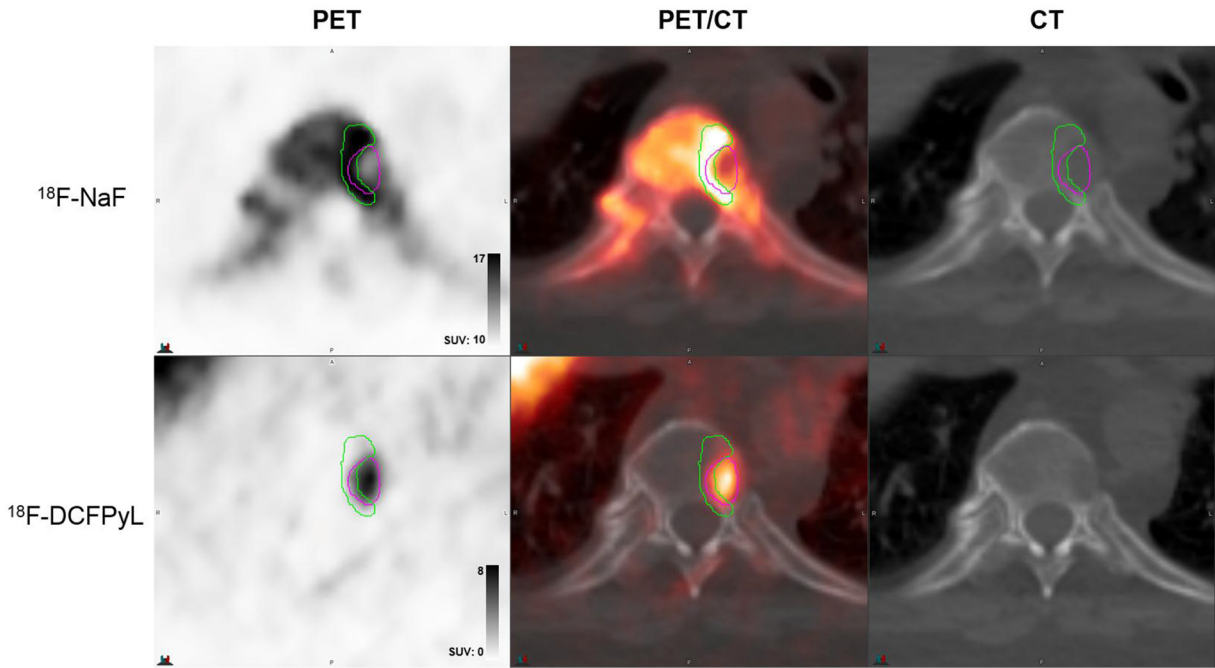

**Supplementary Figure 2: Uptake discordance in lytic bone lesion of patient with newly diagnosed prostate cancer (Gleason Grade Group 5 adenocarcinoma with squamous differentiation present) and serum PSA 16 ng/mL.** Patient demonstrated 16 metastases detected by both  $^{18}\text{F}$ -NaF and  $^{18}\text{F}$ -DCFPyL imaging, with 4 meeting study inclusion criteria, of which only one of which was lytic.

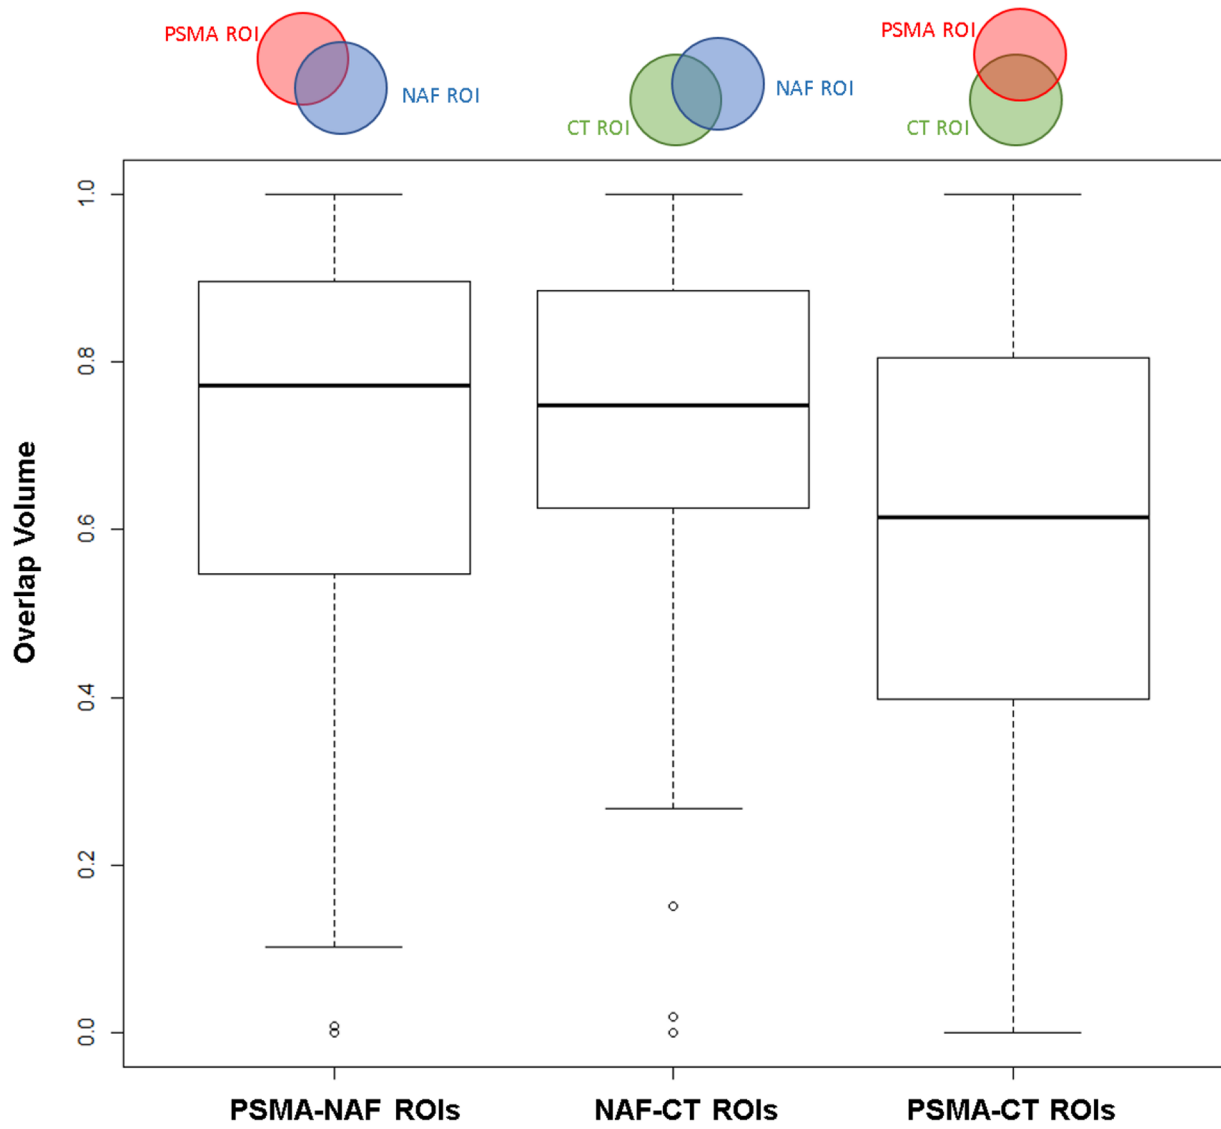

**Supplementary Figure 3: Lesion-level Overlap Volume between PSMA-NaF, NaF-CT, and PSMA-CT ROI pairs.** Overlap volume was significantly lower in PSMA-CT ROIs compared to PSMA-NaF ROIs (p=0.047).

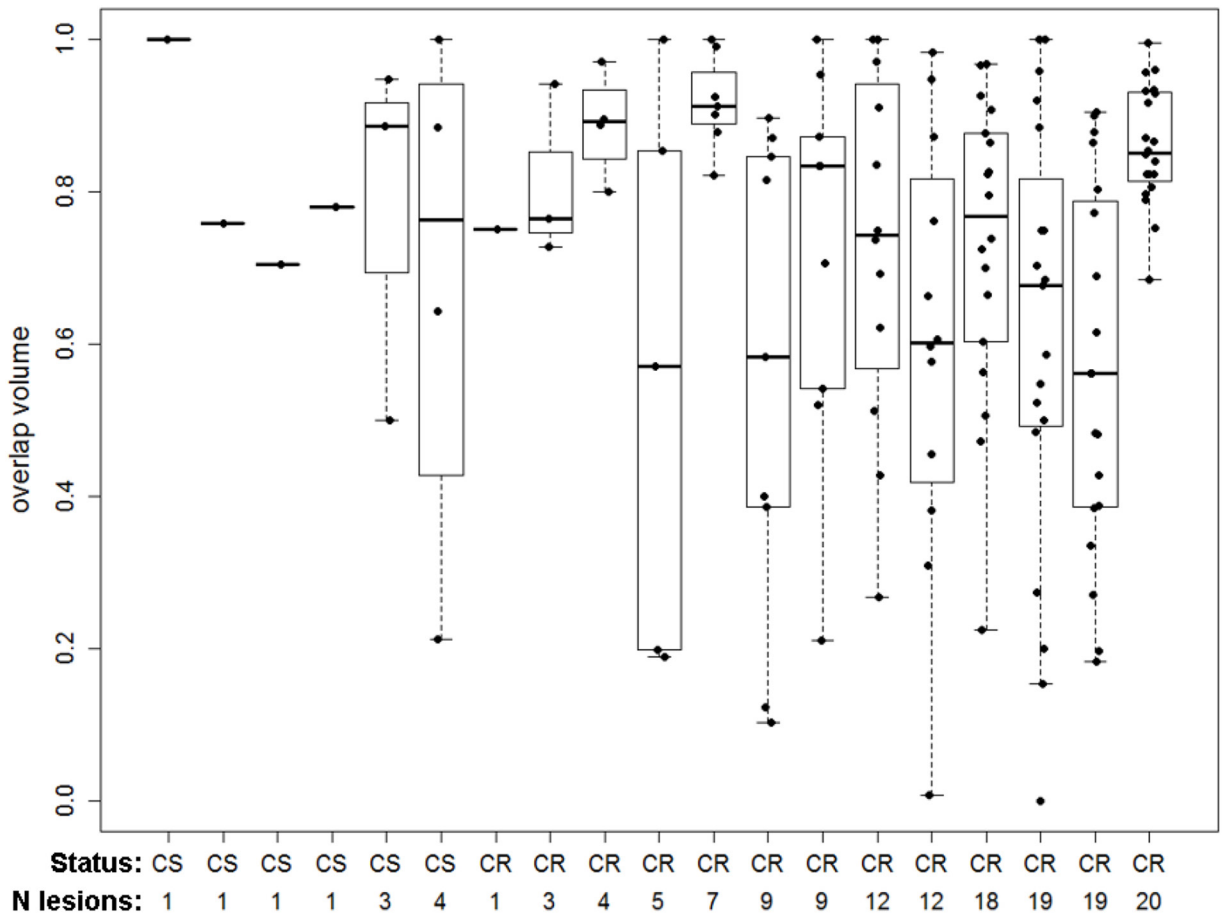

Supplementary Figure 4: Patient-level heterogeneity in overlap volume between NaF and PSMA ROIs with patient disease status (CS = castrate-sensitive, CR = castrate-resistant) and number of lesions included in analysis along x-axis.

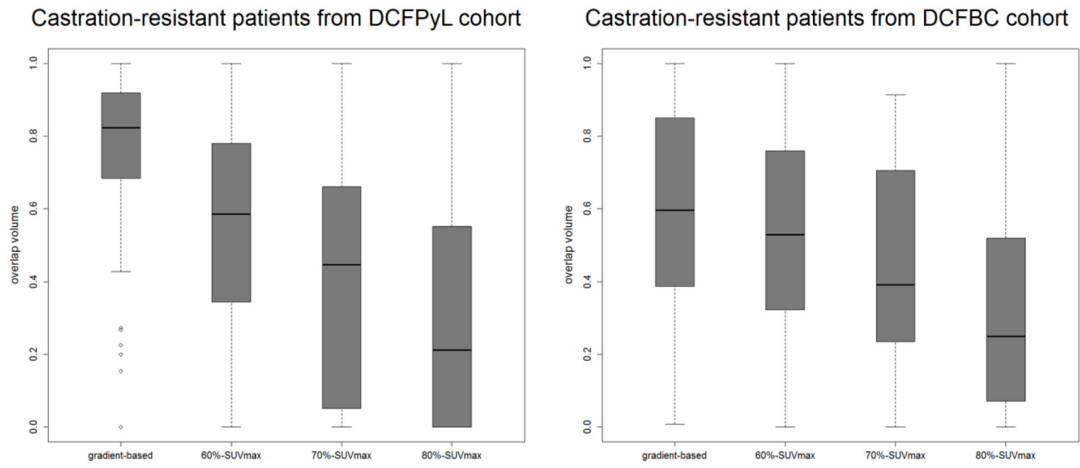

**Supplementary Figure 5: Overlap Volume (OV) vs. segmentation level for castration-resistant patients in DCFPyL cohort (left) and DCFBC cohort (right) at various segmentation levels, demonstrating increased spatial discordance at higher levels of tracer activity.**

**Supplementary Table 1: Summary of patient demographics and treatment history, including number of co-detected bone lesions by NaF PET/CT and PSMA PET/CT and number of lesions meeting inclusion criteria**

| PSMA agent             | PSA   | Current therapy                    | Treatment History                                                                             | Clinical Status | Number bone lesions detected by NaF and PSMA PET/CT | Number of lesions meeting inclusion criteria |
|------------------------|-------|------------------------------------|-----------------------------------------------------------------------------------------------|-----------------|-----------------------------------------------------|----------------------------------------------|
| <sup>18</sup> F-DCFBC  | 4379  | cabazitaxel, enzalutamide          | RPx, RT, ADT, docetaxel, abiraterone                                                          | CRPC            | 19                                                  | 12                                           |
| <sup>18</sup> F-DCFBC  | 0.59  | enzalutimide                       | RT, bicalutimide, leuprolide, degarelix                                                       | CSPC            | 2                                                   | 1                                            |
| <sup>18</sup> F-DCFBC  | 6.55  | bicalutimid                        | bicalutimide, leuprolide, docetaxel, densoumab                                                | CRPC            | 19                                                  | 19                                           |
| <sup>18</sup> F-DCFBC  | 2.08  | leuprolide, enzalutimide           | RPx, RT, triptorelin, denosumab, degarelix, bicalutimide, vaccine                             | CRPC            | 9                                                   | 5                                            |
| <sup>18</sup> F-DCFBC  | 812.3 | goserelin, docetaxel, Cabozantinib | bicalutimide, degarelix, goserelin, provenge, abiraterone, docetaxel, Cabozantinib, denosumab | CRPC            | 17                                                  | 9                                            |
| <sup>18</sup> F-DCFBC  | 388.1 | leuprolide, abiraterone            | RPx, enzalutimide, EBRT, Ra-223, leuprolide, provenge, TAK700                                 | CRPC            | 15                                                  | 9                                            |
| <sup>18</sup> F-DCFBC  | 0.27  | goserelin                          | bicalutimide, goserelin, RT                                                                   | CRPC            | 1                                                   | 1                                            |
| <sup>18</sup> F-DCFPyL | 93.3  | leuprolide                         | casodex, leuprolide, docetaxel, RT, olaparib, enzalutimide                                    | CRPC            | >100                                                | 19                                           |
| <sup>18</sup> F-DCFPyL | >5000 | leuprolide                         | RPx, RT, TAK700, Enzalutimide, Abiraterone, 223Ra, Avelumab, Docetaxel, Cabaitaxel            | CRPC            | >100                                                | 18                                           |

| PSMA agent             | PSA   | Current therapy          | Treatment History                                                               | Clinical Status | Number bone lesions detected by NaF and PSMA PET/CT | Number of lesions meeting inclusion criteria |
|------------------------|-------|--------------------------|---------------------------------------------------------------------------------|-----------------|-----------------------------------------------------|----------------------------------------------|
| <sup>18</sup> F-DCFPyL | 5.61  | leuprolide, enzalutimide | leuprolide, docetaxel, casodex                                                  | CRPC            | 19                                                  | 12                                           |
| <sup>18</sup> F-DCFPyL | 1.73  | leuprolide, enzalutimide | hyperthermic therapy, RT, brachytherapy, triptorelin, casodex, enzalutamide     | CRPC            | 8                                                   | 4                                            |
| <sup>18</sup> F-DCFPyL | 16    | untreated                | new diagnosis                                                                   | CSPC*           | 16                                                  | 4                                            |
| <sup>18</sup> F-DCFPyL | 11.79 | none                     | brachytherapy                                                                   | CSPC            | 1                                                   | 1                                            |
| <sup>18</sup> F-DCFPyL | 3.05  | none                     | RPx, RT, ADT                                                                    | CSPC            | 3                                                   | 3                                            |
| <sup>18</sup> F-DCFPyL | 2.61  | none                     | RPx, RT, ADT                                                                    | CSPC            | 1                                                   | 1                                            |
| <sup>18</sup> F-DCFPyL | 44.45 | leuprolide               | flutamide, nilutamide, vaccine, docetaxel, thaludomide, prednisone, bevacizumab | CRPC            | 10                                                  | 3                                            |
| <sup>18</sup> F-DCFPyL | 169.6 | abiraterone              | RPx, degarelix, docetaxel, bicalutimide, enzalutamide                           | CRPC            | 27                                                  | 7                                            |
| <sup>18</sup> F-DCFPyL | 134.5 | cabazitaxel, carboplatin | RPx, RT, ADT, Provenge, Enzalutamide, Abiraterone, Docetaxel, Olaparib          | CRPC            | >100                                                | 20                                           |
| <sup>18</sup> F-DCFPyL | 4.32  | none                     | RT, brachytherapy, ADT                                                          | CSPC            | 8                                                   | 1                                            |

RPx = radical prostatectomy, RT = radiation therapy, ADT = androgen deprivation therapy (specific therapeutic not specified), Patient marked with (\*) indicating untreated de novo metastatic disease, included with CSPC patients for analysis

**Supplementary Table 2: Spearman correlation of Overlap Volume (OV) with  $HU_{mean}$ ,  $SUV_{max}$ , and volume within NaF and PSMA ROIs derived from gradient-based, 60%- $SUV_{max}$ , 70%- $SUV_{max}$ , and 80%- $SUV_{max}$  segmentations. 95% confidence intervals provided in parentheses**

| ROI method       | PSMA ROI          |                      |                    | NaF ROI             |                     |                    |
|------------------|-------------------|----------------------|--------------------|---------------------|---------------------|--------------------|
|                  | $HU_{mean}$       | $SUV_{max}$          | volume             | $HU_{mean}$         | $SUV_{max}$         | volume             |
| gradient-based   | 0.31 (0.09, 0.48) | -0.03 (-0.25, 0.21)  | 0.20 (0.04, 0.30)  | 0.01 (-0.22, 0.23)  | -0.23 (-0.05, 0.46) | 0.29 (0.14, 0.43)  |
| 60%- $SUV_{max}$ | 0.31 (0.10, 0.50) | -0.24 (-0.44, 0.02)  | 0.01 (-0.24, 0.18) | -0.08 (-0.29, 0.13) | -0.05(-0.27, 0.18)  | 0.02 (-0.20, 0.18) |
| 70%- $SUV_{max}$ | 0.33 (0.11, 0.51) | -0.29 (-0.47, -0.05) | 0.06 (-0.25, 0.30) | -0.10 (-0.31, 0.09) | -0.09 (-0.28, 0.10) | 0.02 (-0.24, 0.21) |
| 80% $SUV_{max}$  | 0.36(0.14, 0.54)  | -0.29 (-0.45, -0.08) | 0.06 (-0.25, 0.27) | -0.10 (-0.28, 0.10) | -0.09 (-0.25, 0.07) | 0.03 (-0.21, 0.21) |



**Supplementary Table 3: Spearman correlation of  $HU_{mean}$  and  $SUV_{max}$  within NaF and PSMA ROIs, derived from gradient-based, 60%- $SUV_{max}$ , 70%- $SUV_{max}$ , and 80%- $SUV_{max}$  segmentations**

| <b>ROI method</b> | <b>PSMA ROI</b>     | <b>NaF ROI</b>     |
|-------------------|---------------------|--------------------|
| gradient-based    | 0.06 (-0.26, 0.31)  | 0.19 (-0.2, 0.43)  |
| 60%- $SUV_{max}$  | -0.09 (-0.36, 0.15) | 0.23 (-0.14, 0.46) |
| 70%- $SUV_{max}$  | -0.13 (-0.40, 0.10) | 0.20 (-0.15, 0.44) |
| 80% $SUV_{max}$   | -0.15 (-0.39, 0.06) | 0.18 (-0.17, 0.43) |

95% confidence intervals provided in parentheses.
